# Supplementary material for: Facile hydrothermal synthesis of ternary Ni–Co–Se/carbon nanotube nanocomposites as advanced electrodes for lithium storage
Source: Royal Society of Chemistry journal article supplement (doi:10.1039/c8ra05142a), 2018-01-01
Supplement: c8ra05142a1.pdf [file c8ra05142a1.pdf]

## Supporting Information

Jingguo Ding, Hui Xu, Xiaobo Chen\*

School of New Energy and Electronic Engineering, Yancheng Teachers University,  
Yancheng, 224051, PR China

(\* Corresponding autor: E-mail: [chenxbok@126.com](mailto:chenxbok@126.com), Tel: 86-515-88233177

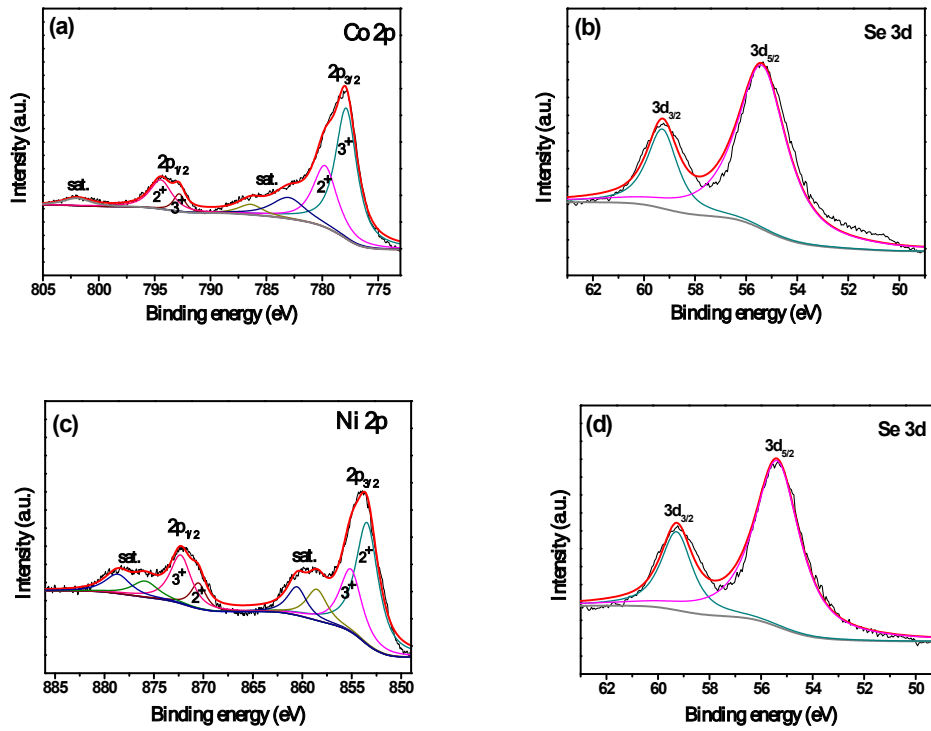

**Fig.S1.**high resolution XPS spectra:(a) Co 2p and (b) Se 3d of CoSe<sub>2</sub>/CNT, (c) Co 2p and (d) Se 3d of NiSe<sub>2</sub>/CNT.

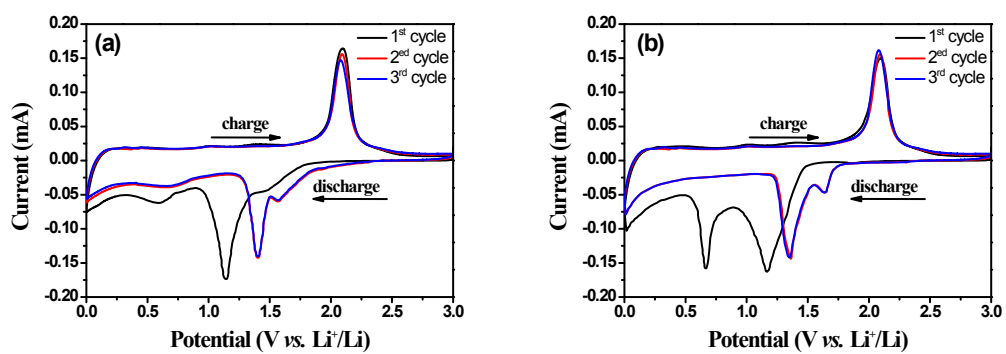

**Fig.S2.** Representative CV curves of (a) CoSe<sub>2</sub>/CNT and (b) NiSe<sub>2</sub>/CNT.

**Table S1** Electrochemical performances comparison of this work versus the reported transition-metal chalcogenide based anode materials for LIBs.

| Materials                                         | Current density | Cycles | Capacity (mAh/g) | Reference |
|---------------------------------------------------|-----------------|--------|------------------|-----------|
| Ni-Co-Se/CNT                                      | 0.5 A/g         | 100    | 687.8            | This work |
| CoSe@PCP                                          | 0.2 A/g         | 100    | 675              | 1         |
| Co <sub>0.85</sub> Se Nanosheet                   | 0.1 A/g         | 50     | 516              | 2         |
| CoSe@C Hollow box                                 | 0.2 A/g         | 100    | 860              | 3         |
| NC/CoS <sub>2</sub> -650                          | 0.1 A/g         | 50     | 560              | 4         |
| Worm-like CoS <sub>2</sub>                        | 0.1 A/g         | 100    | 883              | 5         |
| Yolk-shell CoS <sub>2</sub> @NG                   | 0.1 A/g         | 150    | 621              | 6         |
| Ni <sub>3</sub> Se <sub>2</sub>                   | 0.5 A/g         | 100    | 626.7            | 7         |
| NiSe/C Core-shell sphere                          | 0.1 A/g         | 50     | 428              | 8         |
| NiSe <sub>2</sub> /C Nanoplate                    | 1 A/g           | 100    | 428              | 9         |
| NiSe Thin film                                    | 0.1 A/g         | 200    | 314.9            | 10        |
| NiS <sub>2</sub> @CoS <sub>2</sub> @C@C nanocubes | 0.1 A/g         | 100    | 680              | 11        |
| MoSe <sub>2</sub> /C Sheet                        | 0.1 A/g         | 100    | 150              | 12        |
| MoSe <sub>2</sub> @C Hollow sphere                | 1 A/g           | 100    | 681              | 13        |
| MoSe <sub>2</sub> /rGO Nanosheet                  | 0.1 A/g         | 100    | 715              | 14        |
| VSe/graphene                                      | 0.1 A/g         | 60     | 632              | 15        |

## References

- [1] J. Li, D. Yan, T. Lu, et al. An advanced CoSe embedded within porous carbon polyhedra hybrid for high performance lithium-ion and sodium-ion batteries. *Chem. Eng. J.*, 2017, 325: 14-24.
- [2] J.S. Zhou, Y. Wang, J. Zhang, T.P. Chen, H.H. Song and H. Y. Yang. Two dimensional layered Co<sub>0.85</sub>Se nanosheets as a high-capacity anode for lithium-ion batteries. *Nanoscale*, 2016, 8, 14992-15000.
- [3] H. Hu, J.T. Zhang, B.Y. Guan, and X. W. (David) Lou. Unusual Formation of

CoSe@carbon Nanoboxes, which have an Inhomogeneous Shell, for Efficient Lithium Storage. *Angew. Chem. Int. Ed.* 2016, 55, 9514-9518.

[4] Q. Wang, R. Zou, W. Xia, et al. Facile Synthesis of Ultrasmall CoS<sub>2</sub> Nanoparticles within Thin N - Doped Porous Carbon Shell for High Performance Lithium - Ion Batteries. *Small*, 2015, 11(21): 2511-2517..

[5] R. Jin, L. Yang, G. Li, et al. Hierarchical worm-like CoS<sub>2</sub> composed of ultrathin nanosheets as an anode material for lithium-ion batteries. *J. Mater. Chem. A*, 2015, 3(20): 10677-10680.

[6] W. Qiu, J. Jiao, J. Xia, et al. A Self - Standing and Flexible Electrode of Yolk-Shell CoS<sub>2</sub> Spheres Encapsulated with Nitrogen - Doped Graphene for High - Performance Lithium - Ion Batteries. *Chem.-Eur. J.*, 2015, 21(11): 4359-4367.

[7] X. Li, S. Li, Z. Zhang, et al. Ni<sub>3</sub>Se<sub>2</sub> electrodes for high performance lithium-ion and sodium-ion batteries. *Mater. Lett.*, 2018, 220:86-89.

[8] Z.A. Zhang, X.D. Shi, X. Yang. Synthesis of core-shell NiSe/C nanospheres as anodes for lithium and sodium storage. *Electrochim. Acta*, 2016, 208, 238-243.

[9] H.S. Fan, H. Yu, X.L. Wu, Y. Zhang, Z.Z. Luo, H.W. Wang, Y.Y. Guo, S.Madhavi, and Q.Y. Yan. Controllable Preparation of Square Nickel Chalcogenide (NiS and NiSe<sub>2</sub>) Nanoplates for Superior Li/Na Ion Storage Properties. *ACS Appl. Mater. Interfaces*, 2016, 8, 25261-25267.

[10] M.Z. Xue, Z.W. Fu. Lithium electrochemistry of NiSe<sub>2</sub>: A new kind of storage energy material. *Electrochem. Comm.* 2006, 8, 1855-1862.

[11] Y. Lin, Z. Qiu, D. Li, et al. NiS<sub>2</sub>@CoS<sub>2</sub> nanocrystals encapsulated in N-doped carbon nanocubes for high performance lithium/sodium ion batteries. *Energy Storage Mater.*, 2017.

[12] Y. Liu, M.Q. Zhu and D. Chen. Sheet-like MoSe<sub>2</sub>/C composites with enhanced Li ion storage properties. *J. Mater. Chem. A*, 2015, 3, 11857-11862.

[13] X. Yang, Z.A. Zhang, Y. Fu and Q. Li. Porous hollow carbon spheres decorated with molybdenum diselenide nanosheets as anodes for highly reversible lithium and sodium storage. *Nanoscale*, 2015, 7, 10198-10203.

[14] Z.G. Luo, J. Zhou, L.R. Wang, G.Z. Fang, A.Q. Pan and S.Q. Liang. Two-dimensional hybrid nanosheets of few layered MoSe<sub>2</sub> on reduced graphene oxide as anodes for long-cycle-life lithium-ion batteries. *J. Mater. Chem. A*, 2016, 4, 15302-15308.

[15] Y. Wang, B. Qian, H. Li, L. Liu, L. Chen, H. Jiang, VSe<sub>2</sub>/graphene nanocomposites as anode materials for lithium-ion batteries, *Mater. Lett.* 141 (2015) 35-38.
